# Supplementary material
Source: Springer Nature journal article supplement (https://www.springermedizin.de/resource/supplementary/12882_2013_920_MOESM4_ESM.pdf/9453964)

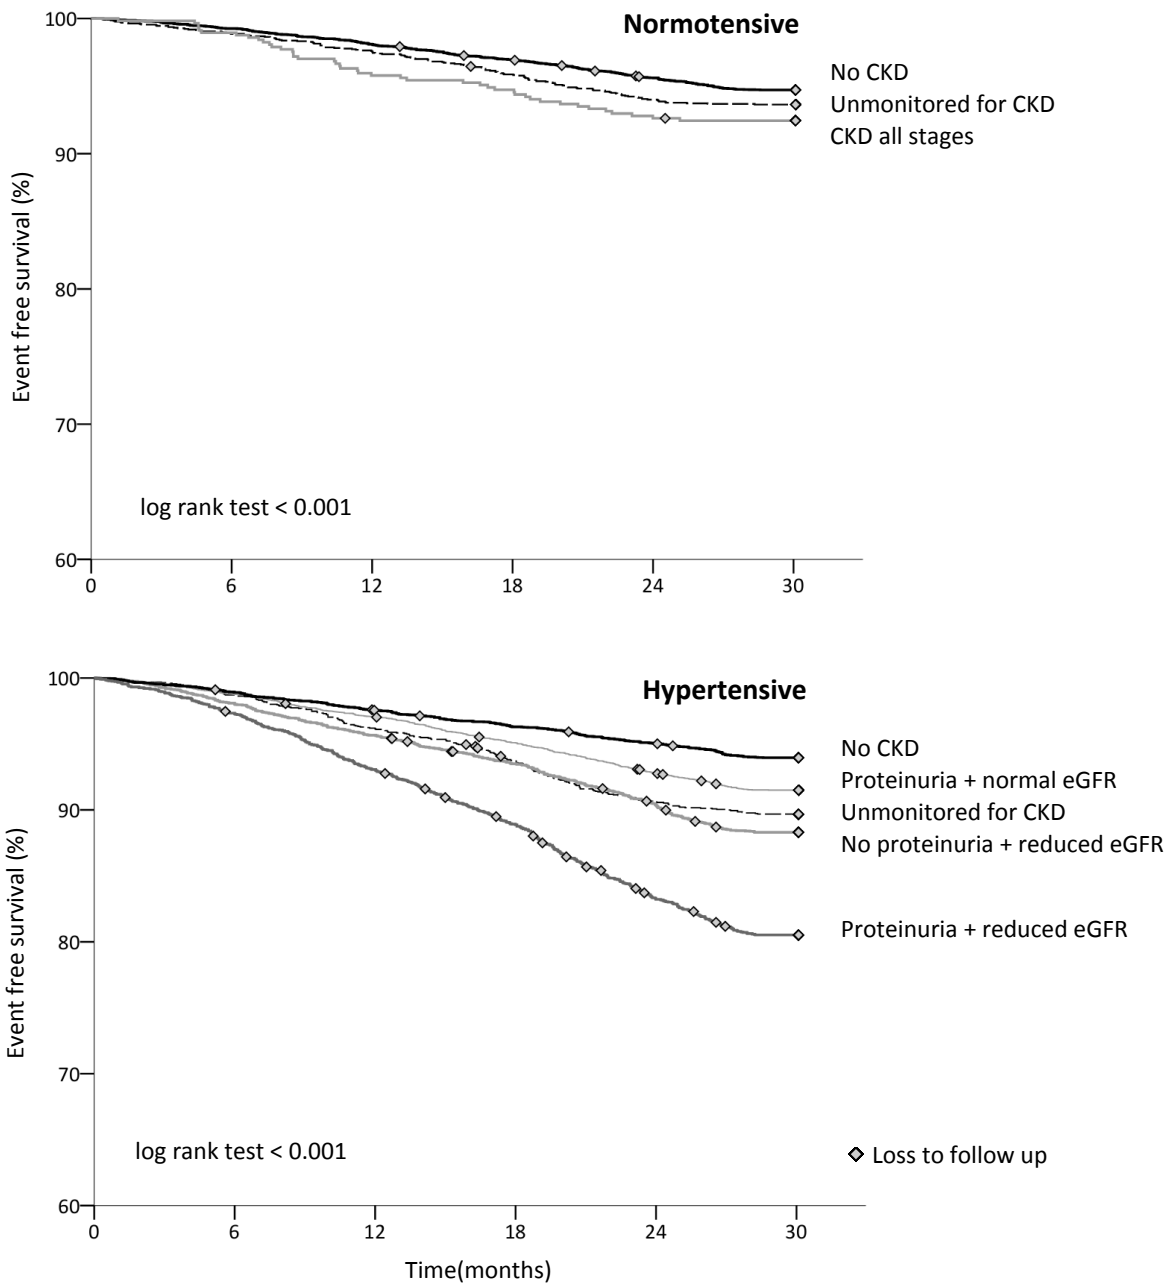

Supplement: MOESM4 [file 9453964]
